# Supplementary material
Source: PubMed Central journal article supplement (PMC10019205)
Supplement: aac.01424-22-s0002.pdf [file aac.01424-22-s0002.pdf]

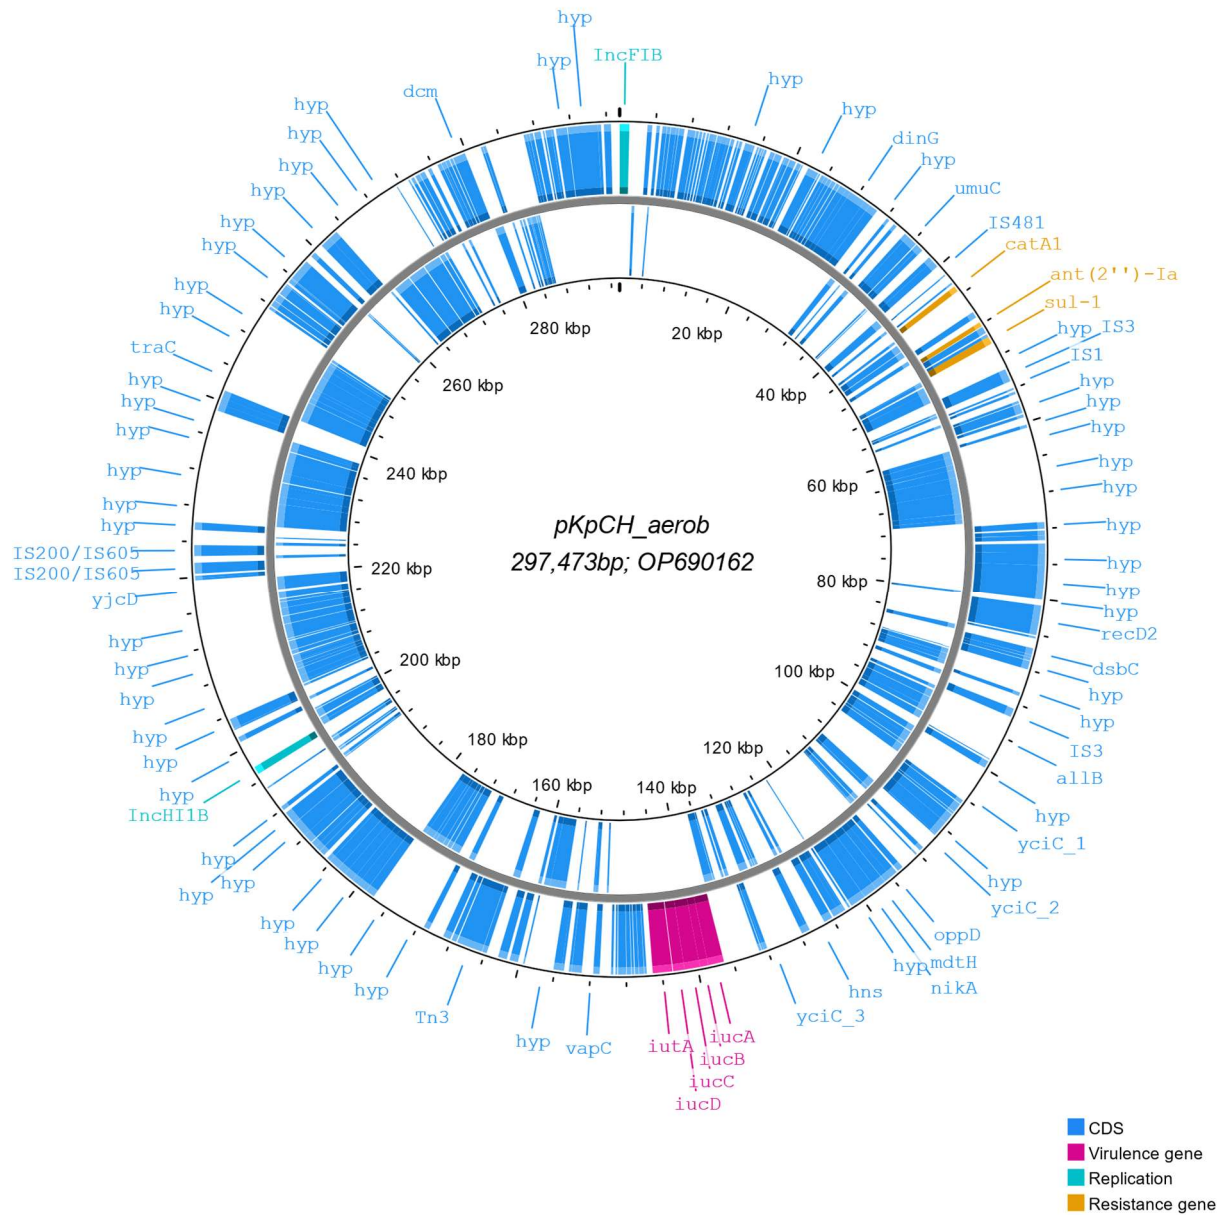

**Figure S2. Schematic representation of virulence plasmid pKpCH\_aerob (OP690162) detected in the K2 (ST14 and ST395) isolates.**
